# Supplementary material for: Theoretical insights into the structural, electronic and thermoelectric properties of the inorganic biphenylene monolayer
Source: Royal Society of Chemistry journal article supplement (doi:10.1039/d3cp03088a), 2023-12-04
Supplement: d3cp03088a1.pdf [file d3cp03088a1.pdf]

ELECTRONIC SUPPLEMENTARY INFORMATION

## Theoretical insights on structural, electronic and thermoelectric properties of inorganic biphenylene monolayer

Ajay Kumar<sup>a</sup> Parbati Senapati<sup>a</sup> and Prakash Parida<sup>a\*</sup>

<sup>a</sup> Department of Physics, Indian Institute of Technology Patna, Bihta, Bihar, India

\*Corresponding author: - [pparida@iitp.ac.in](mailto:pparida@iitp.ac.in)

| Content  | Page No. |
|----------|----------|
| Fig. S1  | 1        |
| Fig. S2  | 2        |
| Table S1 | 3        |
| Fig. S3  | 4        |
| Fig. S4  | 4        |
| Fig. S5  | 5        |

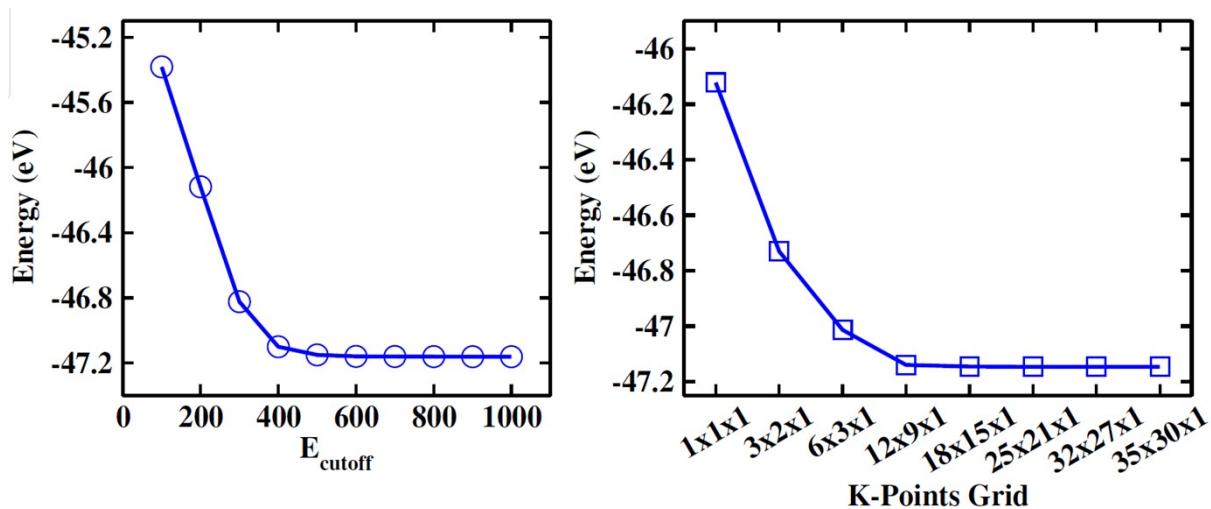

**Fig S1:** The energy convergence test for plane wave energy cutoff (left) and K-points grid (right)

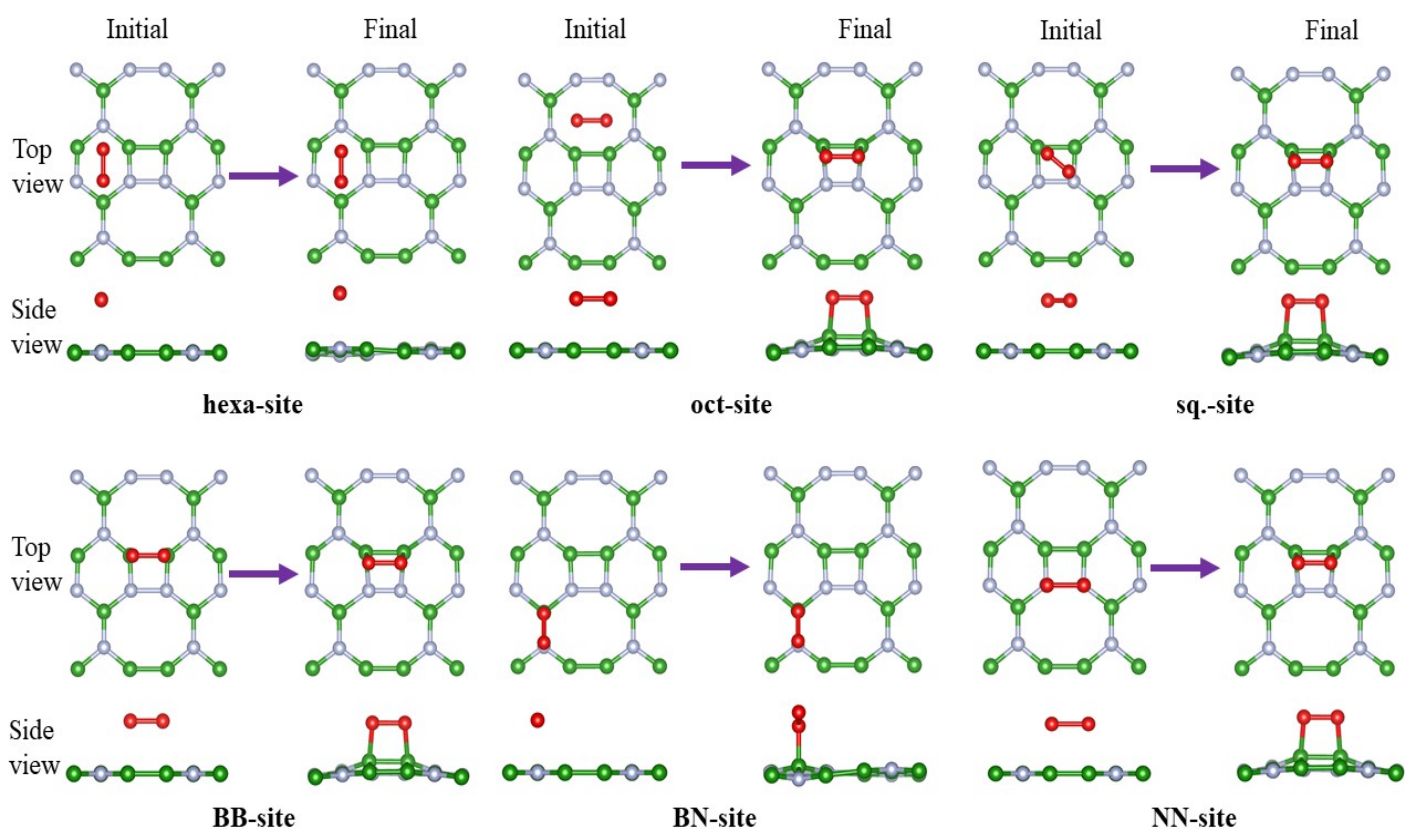

**Fig S2:** The initial (before relaxation) and final (after relaxation) structures of oxygen molecule ( $O_2$ ) adsorbed at all possible sites of the I-BPN monolayer.

**Table S1** reports the net Bader charge on each atom for both the pristine and oxygen-adsorbed I-BPN monolayer. The figure on the right side of Table S1 displays the labels for all atoms.

| Atoms | Net charge in pristine I-BPN and $O_2$ | Net charge in $O_2$ adsorbed I-BPN at BB-site | Net Charge transfer |
|-------|----------------------------------------|-----------------------------------------------|---------------------|
| B1    | 1.92                                   | 1.92                                          | 0                   |
| B2    | 1.9                                    | 1.91                                          | 0.01                |
| B3    | 1.92                                   | 1.92                                          | 0                   |
| B4    | 1.85                                   | 1.98                                          | 0.13                |
| B5    | 2.02                                   | 2.02                                          | 0                   |
| B6    | 1.95                                   | 2.07                                          | 0.12                |
| B7    | 2.02                                   | 2.02                                          | 0                   |
| B8    | 2.01                                   | 2.01                                          | 0                   |
| B9    | 3                                      | 3                                             | 0                   |

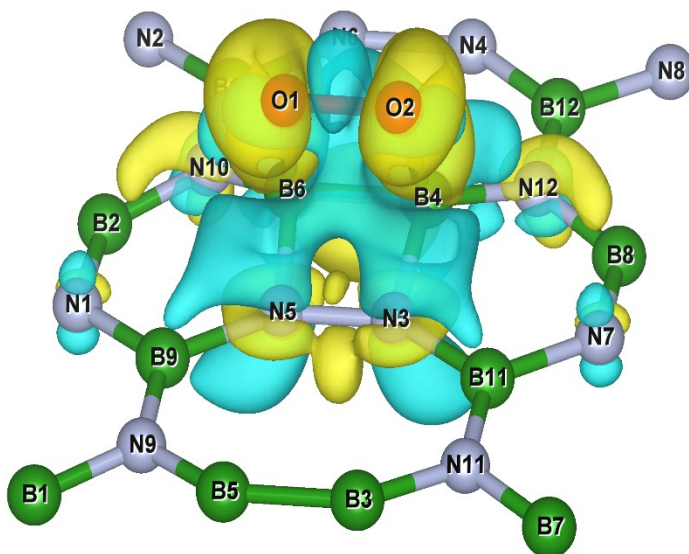

|     |       |       |       |
|-----|-------|-------|-------|
| B10 | 3     | 3     | 0     |
| B11 | 3     | 3     | 0     |
| B12 | 3     | 3     | 0     |
| N1  | -1.96 | -1.9  | 0.06  |
| N2  | -1.96 | -1.94 | 0.02  |
| N3  | -1.84 | -1.52 | 0.32  |
| N4  | -1.96 | -1.93 | 0.03  |
| N5  | -1.69 | -1.36 | 0.33  |
| N6  | -1.85 | -1.82 | 0.03  |
| N7  | -1.84 | -1.79 | 0.05  |
| N8  | -1.85 | -1.83 | 0.02  |
| N9  | -3.13 | -3.11 | 0.02  |
| N10 | -3.14 | -3.12 | 0.02  |
| N11 | -3.12 | -3.11 | 0.01  |
| N12 | -3.14 | -3.12 | 0.02  |
| O1  | 0     | -0.66 | -0.66 |
| O2  | 0     | -0.65 | -0.65 |

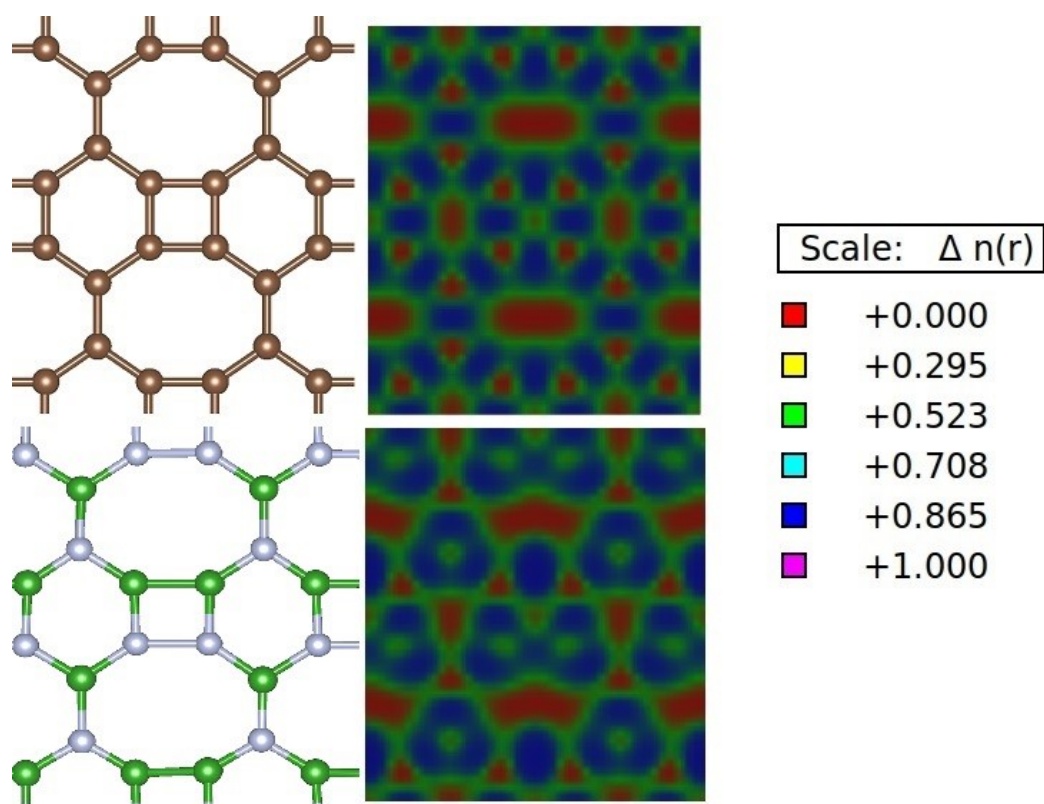

**Fig S3:** The BPN and I-BPN structures and their corresponding electron localized function plots with an iso-surface of  $0.02 \text{ eV/\AA}$

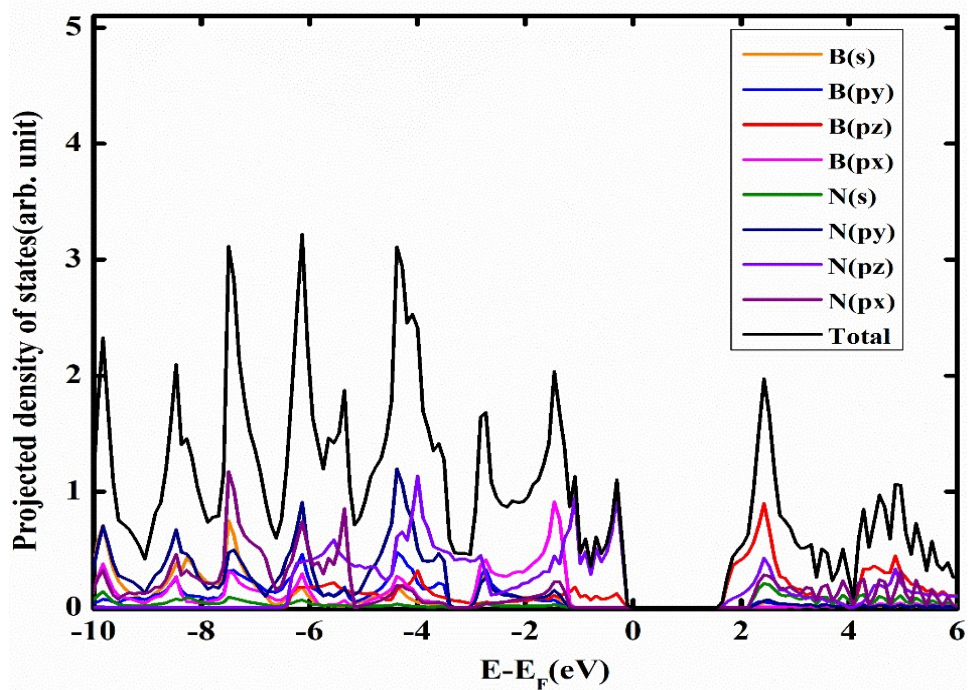

Fig S4: projected density of states of I-BPN

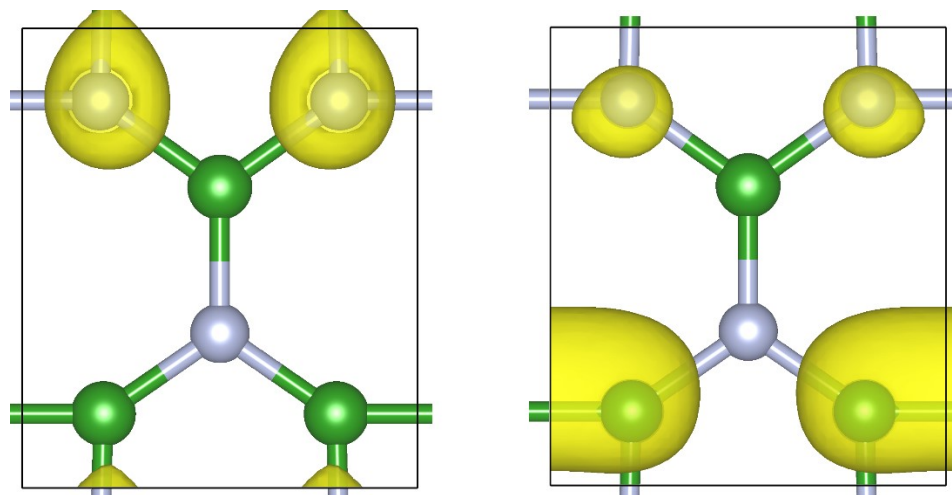

Fig S5: The Valence band maximum (left) and conduction bands minimum (right) of the electronic band structure of I-BPN per unit cell.
